# Supplementary material for: A gold nanoparticle-based visual aptasensor for rapid detection of acetamiprid residues in agricultural products using a smartphone
Source: Royal Society of Chemistry journal article supplement (doi:10.1039/d2ra00348a), 2022-01-01
Supplement: d2ra00348a1.pdf [file d2ra00348a1.pdf]

# **A gold nanoparticles-based visual aptasensor for rapid detection of acetamiprid residues in agricultural products by using a smartphone**

Chengnan Xu <sup>a,1,\*</sup>, Mei Lin <sup>a,1</sup>, Chaonan Song <sup>b</sup>, Danli Chen <sup>b</sup>, Caimiao Bian <sup>b,\*</sup>

<sup>a</sup>Zhejiang Citrus Research Institute, Taizhou, 318026, China

<sup>b</sup>School of Life Science, Taizhou University, Taizhou, 318001, China

\*Correspondence: xcnpub@163.com (C. Xu), blancaimiao@tzc.edu.cn (C. Bian)

<sup>1</sup>These authors contributed equally to this work.

**Figure S1.** 3D printed black box illuminated with two LED lamps.

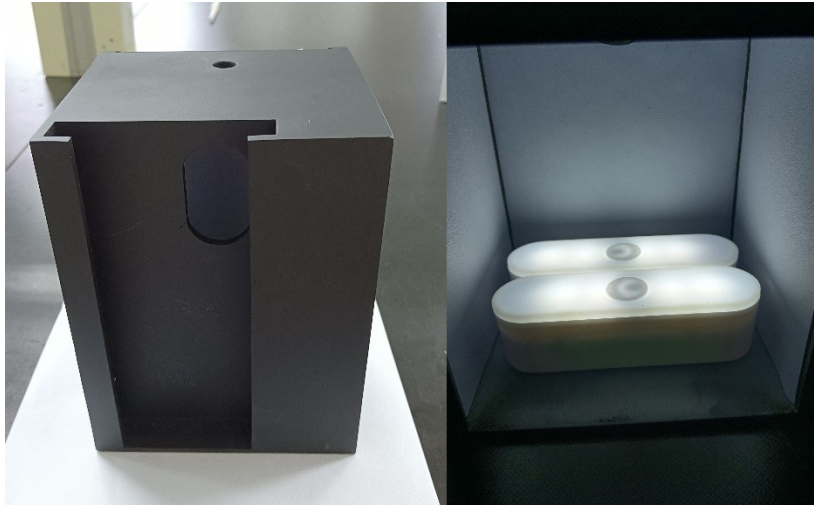

**Figure S2.** The trend of R/G/B value with increment of acetamiprid.

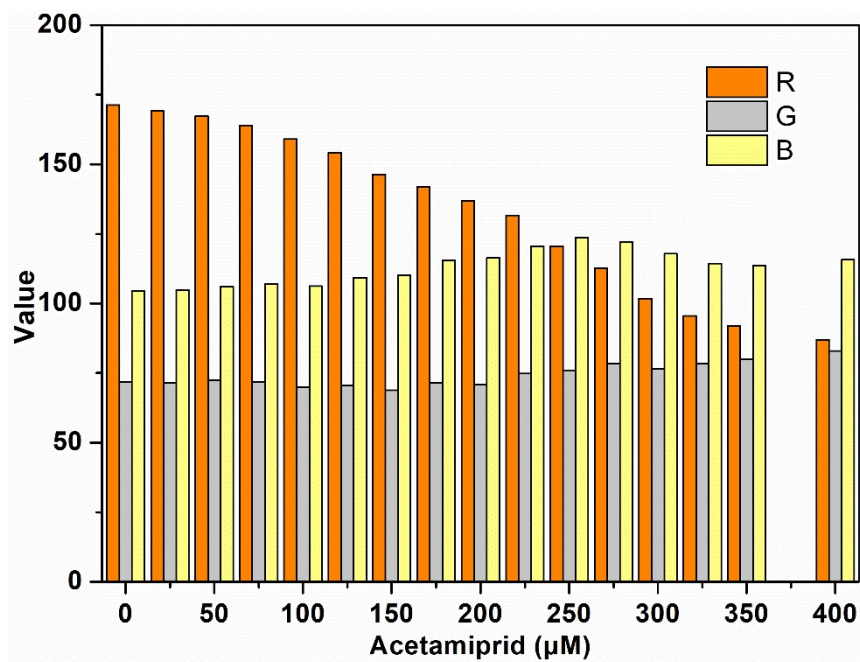

**Figure S3.** (a) UV-vis absorption of the visual sensing method with different concentrations of acetamiprid in the range from 0 to 400  $\mu\text{M}$ . (b) The calibration curve of different acetamiprid concentrations ranging from 0 to 220  $\mu\text{M}$ .

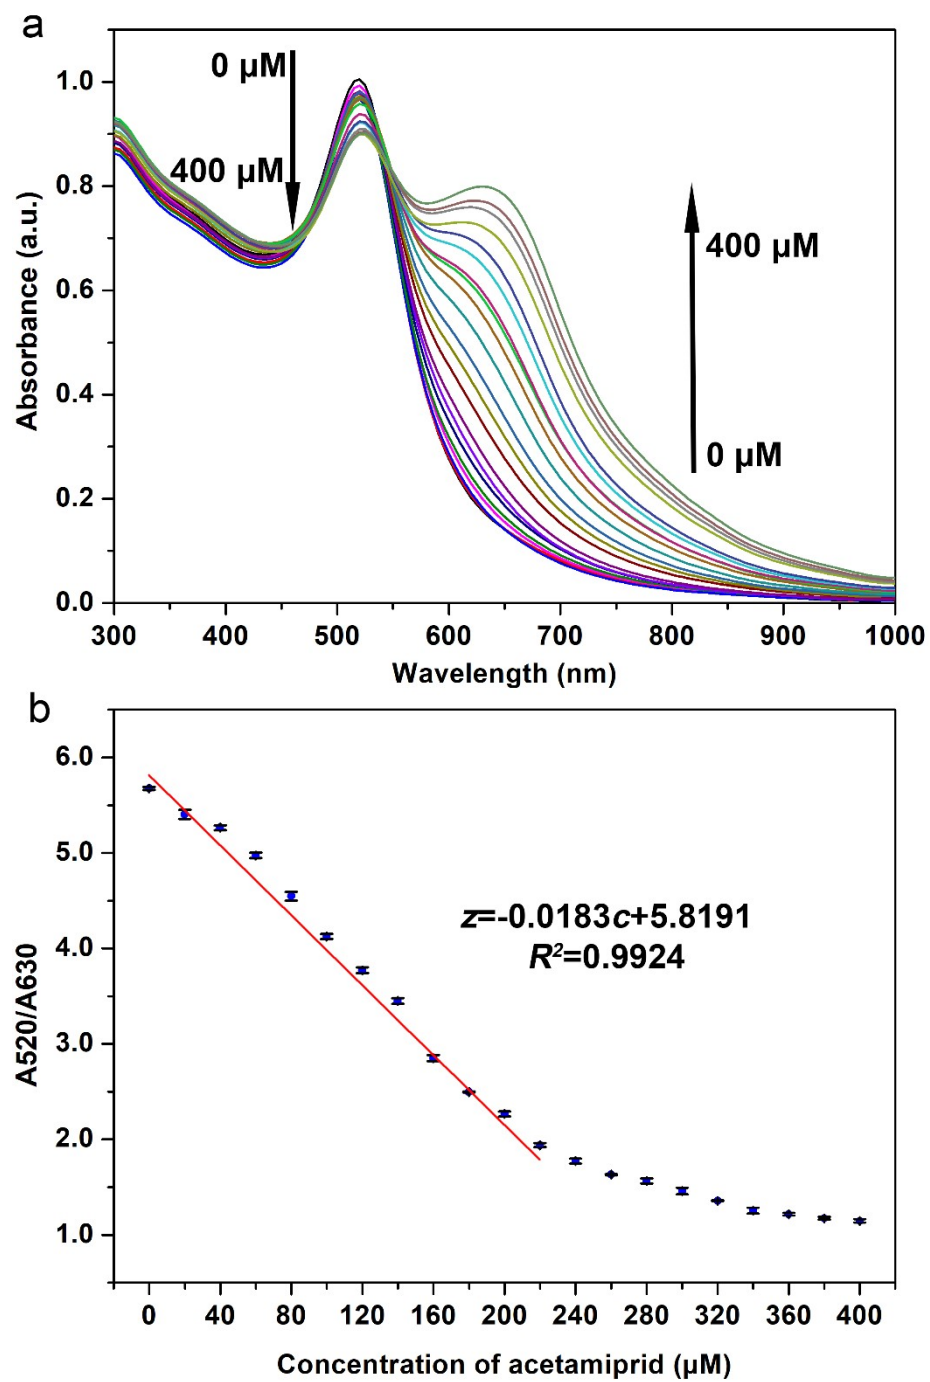

**Table S1.** Comparison of the reported aptasensor for acetamiprid detection.

| <b>Methods</b>    | <b>Detected range</b>       | <b>LOD</b>                | <b>Ref.</b> |
|-------------------|-----------------------------|---------------------------|-------------|
| SERS              | 1-10000 nM                  | 10 nM                     | [1]         |
| Fluorescence      | 20–500 nM                   | 5.73 nM                   | [2]         |
| Fluorescence      | 0.5-100 ng·mL <sup>-1</sup> | 166.7 pg·mL <sup>-1</sup> | [3]         |
| Chemiluminescence | 0.021-9 nM                  | 8.9 pM                    | [4]         |
| Electrochemical   | 0.1pM-10 nM                 | 0.0576 pM                 | [5]         |
| Electrochemical   | 50-450 fM                   | 14 fM                     | [6]         |
| Colorimetric      | 0.4-4.5 ppb                 | 0.24 ppb                  | [7]         |
| Colorimetric      | 25-300 μM                   | 3.81 μM                   | This work   |

## References

- [1] Zhou J., Wang D., Yang H., et al. Specific detection of acetamiprid with aptamer based on flexible and adhesive SERS membrane[J]. *Spectrochimica Acta Part A: Molecular and Biomolecular Spectroscopy*, 2021: 120801.
- [2] Zhao Y., Zhang H., Wang Y., et al. A low-background fluorescent aptasensor for acetamiprid detection based on DNA three-way junction-formed G-quadruplexes and graphene oxide[J]. *Analytical and bioanalytical chemistry*, 2021, 413(8): 2071-2079.
- [3] Wang K., Wang Y., Li Q., et al. A fluorescence and localized surface plasmon resonance dual-readout sensing strategy for detection of acetamiprid and organophosphorus pesticides[J]. *Sensors and Actuators B: Chemical*, 2022, 351: 130977.
- [4] Xiu F., Lu Y., Qi Y., et al. Ultrasensitive and practical chemiluminescence sensing pesticide residue acetamiprid in agricultural products and environment: Combination of synergistically coupled co-amplifying signal and smart interface engineering[J]. *Talanta*, 2021, 235: 122811.
- [5] Guo Y., Yang F., Yao Y., et al. Novel Au-tetrahedral aptamer nanostructure for the electrochemiluminescence detection of acetamiprid[J]. *Journal of Hazardous Materials*, 2021, 401: 123794.
- [6] Hamami M., Raouafi N., Korri-Yousoufi H. Self-assembled MoS<sub>2</sub>/SsDNA nanostructures for the capacitive aptasensing of acetamiprid insecticide[J]. *Applied Sciences*, 2021, 11(4): 1382.
- [7] Yang L., Wang X., Sun H., et al. A syringe-aided apta-nanosensing method for colorimetric determination of acetamiprid[J]. *Analytica chimica acta*, 2021, 1150: 238118.
